# Supplementary material for: The Struggle with Hate Speech. Teaching Strategy.
Source: Oxford University Press journal article supplement (doi:10.1242/jcs.254227), 1995-01-01
Supplement: jcs254227supp.pdf [file jcs254227supp.pdf]

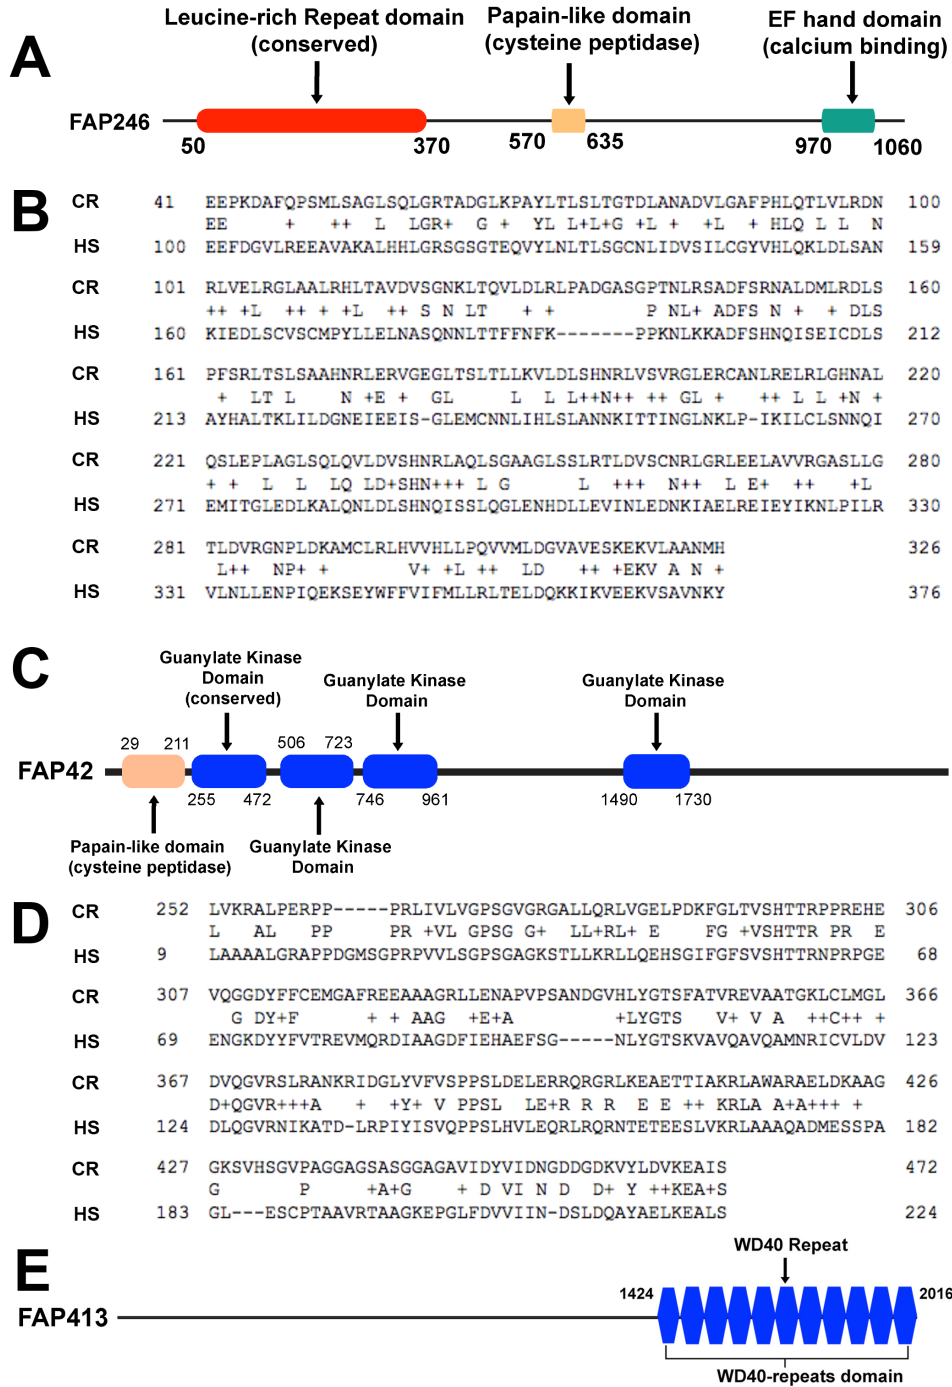

**Fig. S1. Protein domain predictions and sequence alignments.** A-E) Domain predictions for FAP246 (A), FAP42 (C) and FAP413 (E), and sequence alignments of FAP246 (B) and FAP42 (D) with the human proteins LRGUK-1 (NP\_653249) and GUK1 (NP\_000849-1) respectively. CR, *Chlamydomonas reinhardtii*; HS, *Homo sapiens*.

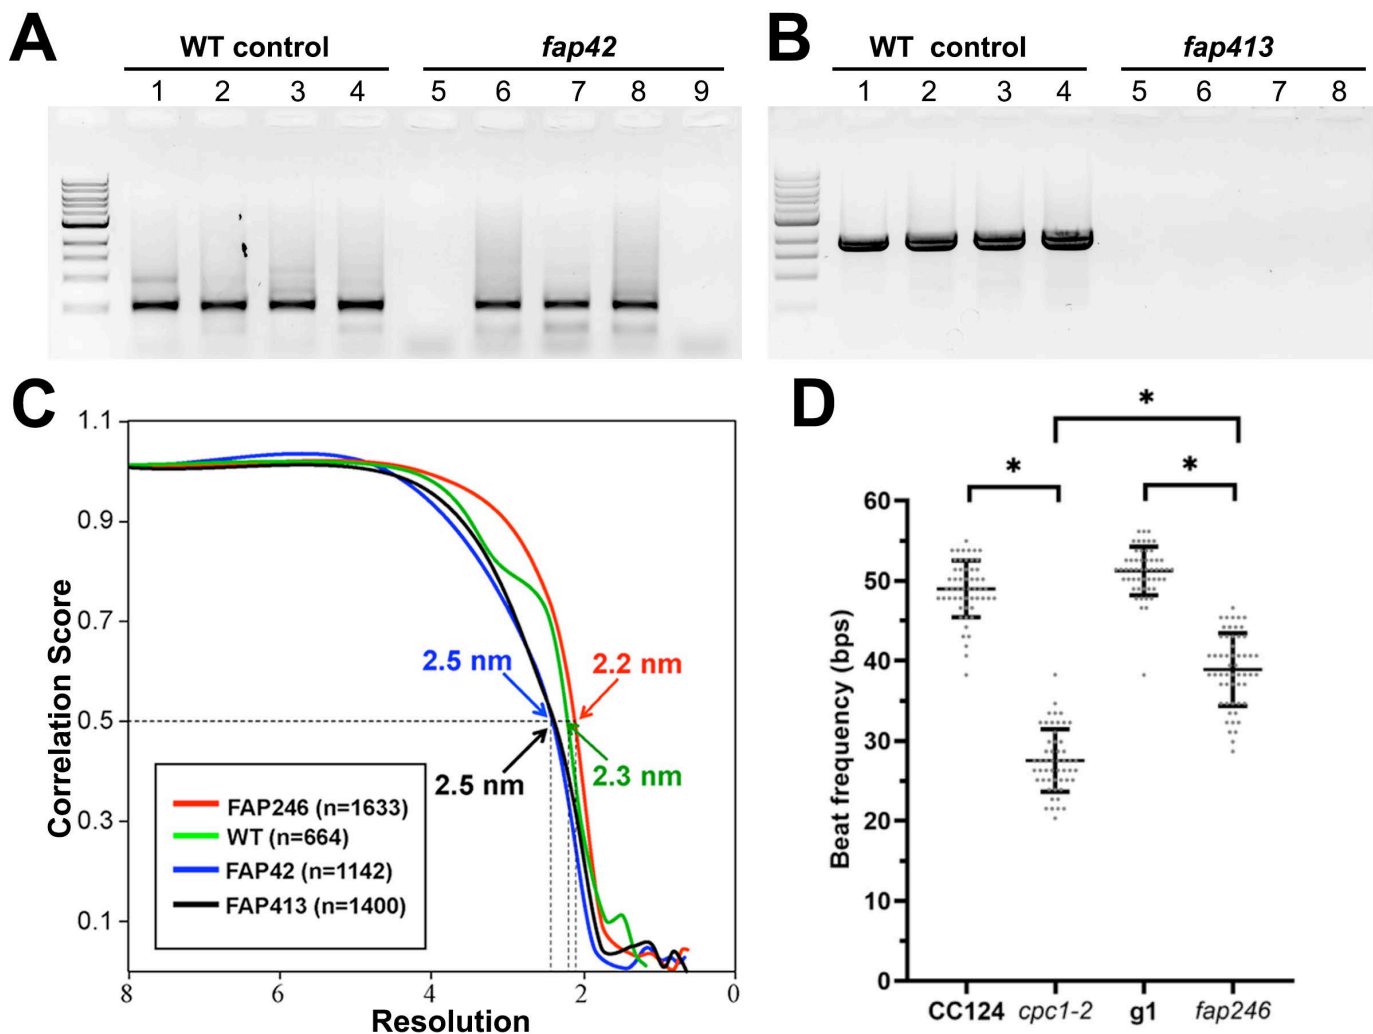

**Fig. S2. Genotyping, resolution estimation and beat frequency analyses of various C1b mutants.** **A-B)** Genotype analyses of the *Chlamydomonas fap42* and *fap413* CliP mutant strains. Lanes 1-4 in both **A)** and **B)** are PCR results of four WT control *Chlamydomonas* colonies, all showing an amplification product of expected size. Lanes 5-9 in **(A)** are the PCR results of five different *fap42* colonies, revealing genetic heterogeneity in the original CLiP cell line. Clones analyzed in mutant lanes 5 and 9 lack the amplification product, confirming disruption of the *FAP42* gene by the insertion cassette in these two clones. The clone of lane 5 was named “*fap42- 1*” and used for further experiments. The primer sets listed in Table S4 were used for both WT control and *fap42* PCR experiments. Lanes 5-8 in **(B)** are the PCR results of four different *fap413* colonies, all showing lack of the amplification product. The clone of lane 5 was named *fap413-1* and used for downstream

experiments. **C)** Fourier Shell Correlation (FSC) curves of the CA averages of WT (green), *fap246* (red), *fap42* (blue) and *fap413* (black) axonemes show that the resolutions are estimated to be 2.3 nm, 2.2 nm, 2.5 nm and 2.5 nm (0.5 criterion), respectively. **D)** Scatterplots showing flagellar beat frequencies of *cpc1* and *fap246* mutants and their respective parental strains CC-124 and g1. For each strain, the solid bars show mean and standard deviation. Significant differences (Student's t test,  $P < 0.01$ ) between strains are indicated by \*.

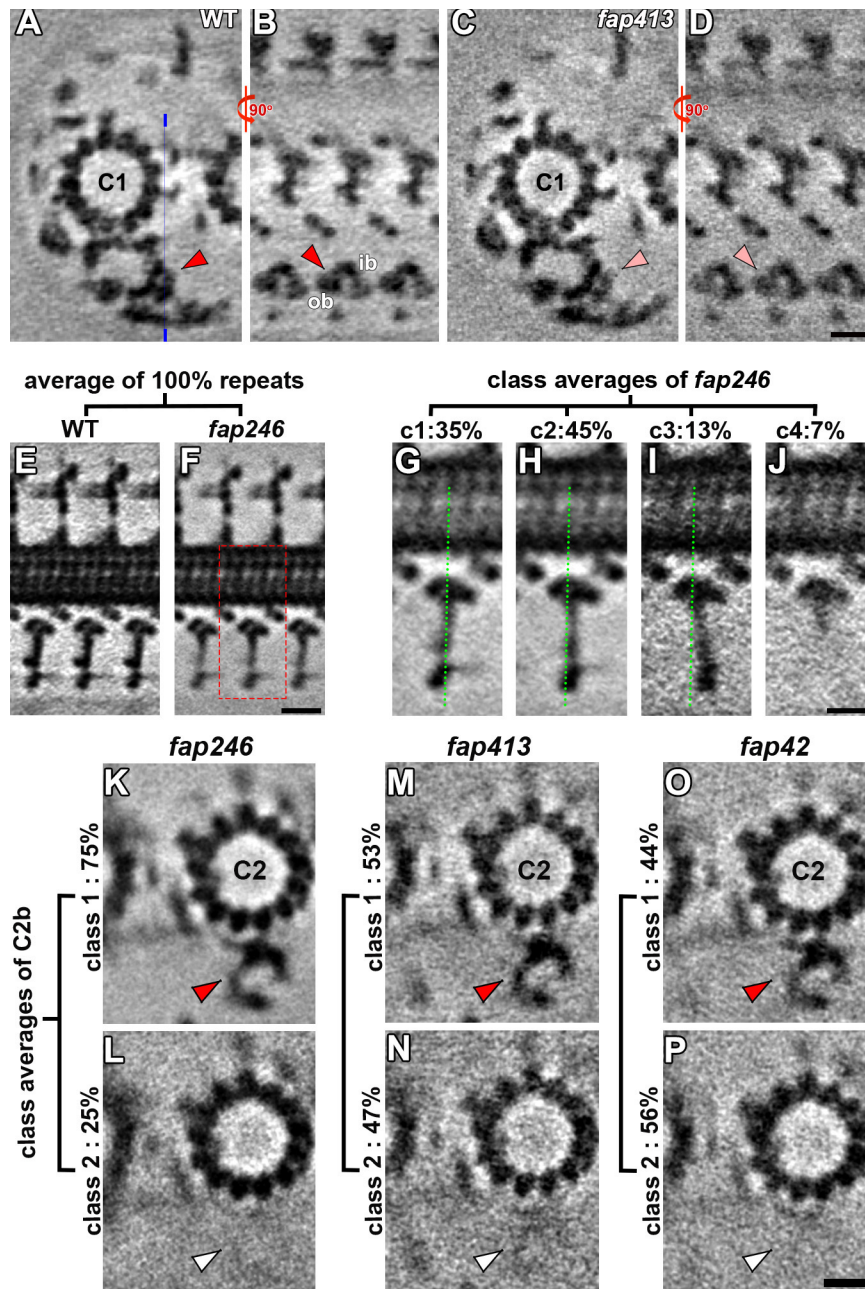

**Fig. S3. Cryo-ET and subtomogram averaging localized FAP413 to the C1b projection, classification analyses of the pillar density of the *fap246* CA revealed positional flexibility, and classification analyses of the CA of all three C1b mutants revealed partial loss of the C2b density. A-D) Tomographic slices of the averaged CA repeats of WT (A and B) and *fap413* (C and D) in cross-sectional (A and C) and longitudinal views (B and D) show that the outer bracket (ob) density is fully present in the wild-type CA (red arrowheads) but significantly weakened in *fap413* (pink arrowheads). The thin blue line in (A) indicates the locations for the**



slices shown in **(B and D)**. Other labels: ib, inner bracket. Scale bar: 10 nm (in **D** valid for **A-D**). **E-J**) Classification analyses revealed structural heterogeneity in the *fap246* but not the WT C1b projection. Longitudinal tomographic slices of the averages that included all CA repeats showed that the pillar density was blurred in the *fap246* mutant (**F**) compared to WT (**E**). Classification analyses focused on the pillar density revealed four distinct classes (percentages of repeats are indicated for each class) (**G-J**). The regions shown in (**G-J**) are indicated by the red dotted box in (**F**). The green dotted lines serve as references to show the positional differences between classes. Scale bars: 10 nm (in **F** valid for **E and F**); 5 nm (in **J** valid for **G-J**). **K-P**) Classification analyses focused on the C2b density of the CA averages of *fap246* (**K-L**), *fap413* (**M-N**) and *fap42* (**O-P**) all revealed two distinct classes (percentages of repeats are indicated for each class). In the cross-sectional views for each mutant, the density is present (red arrowheads) in class 1 and missing (white arrowheads) in class 2. Scale bars: 10 nm (in **P** valid for **K-P**).

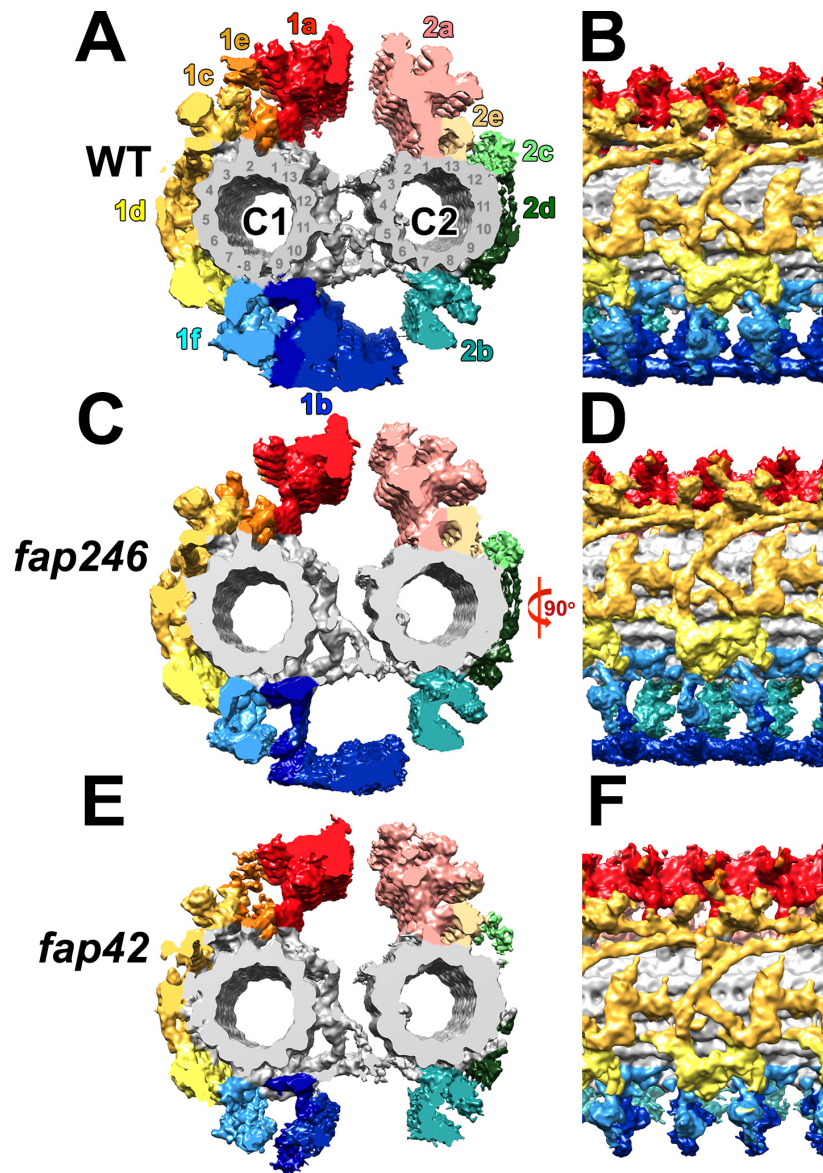

**Fig. S4.** Averaged CA repeats of WT, *fap246* and *fap42* revealed structural defects of the indicated mutants. **A-F** Isosurface renderings showing the *entire* averaged CA repeats (as compared to partial views in various main figures) of WT (**A** and **B**), *fap246* (**C** and **D**), and *fap42* (**E-F**) viewed in cross-sectional (**A**, **C** and **E**) and longitudinal orientations (**B**, **D** and **F**).

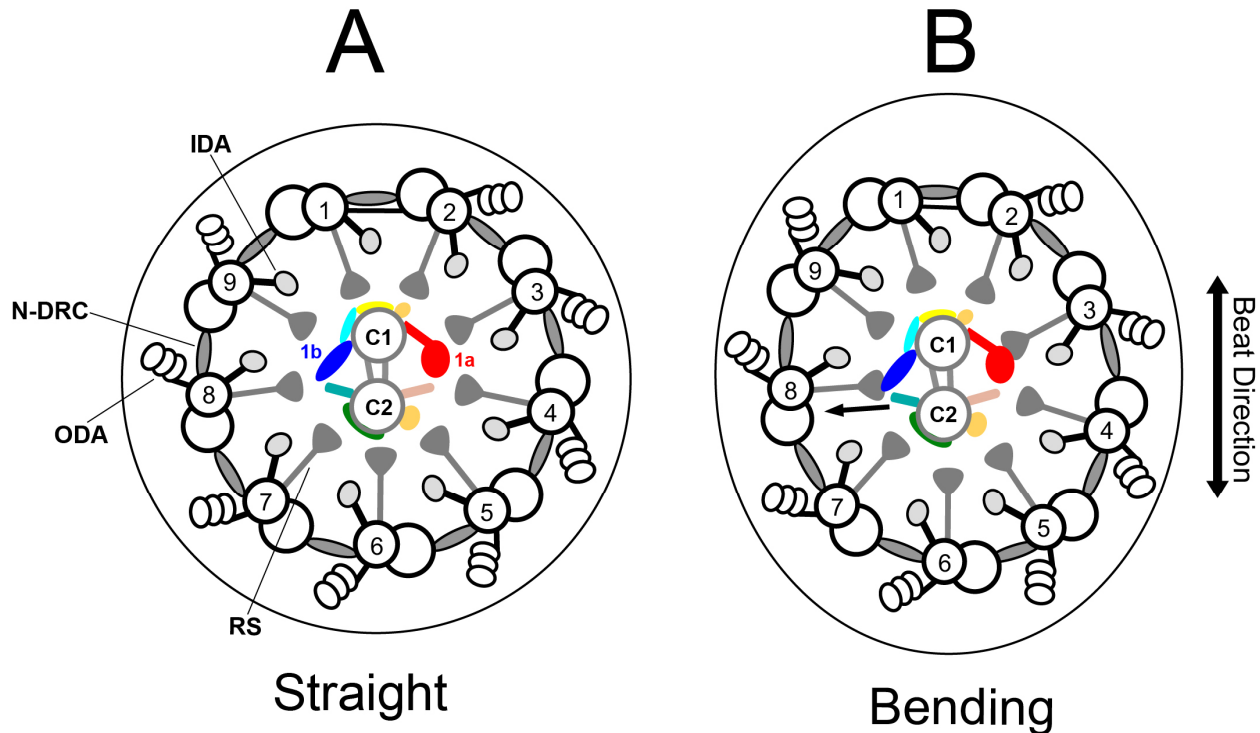

**Fig. S5. Model depicting how the C1b projection may resist compression force during axonemal bending and how CA-RS mechano-signaling may transmit signals to regulate dynein activity and ciliary motility. A)** In a straight flagellum, the 9 DMTs of the axoneme are cylindrically arranged around the CA, and all RS heads are equally distant from the circumference of the CA, i.e. the outermost periphery of the CA projections. **B)** In bent regions of a *Chlamydomonas* flagellum, the C1 and C2 microtubules are both in the plane of bend and, at least in the principal bend, C1 is on the outside of the bend, facing DMT 1 (Mitchell, 2003). When the flagellum bends, the axoneme becomes wider in the plane of bend (Lindemann and Mitchell, 2007), causing the RS heads to mechanically push against the C1a (red) and C2a (pink) projections on one side of the CA and the C1b (dark blue) and C2b (light green) projections on the opposite side. The pillar-bracket-beam structure of the C1b projection provides structural stability that likely resists this mechanical force (arrow). This mechanical interaction between the CA and RSs also could play a role in transmitting signals that regulate dynein activity and thus ciliary beating. In both panels, the axoneme is viewed from inside the cell. DMTs are numbered according to (Hoops and Witman, 1983); the black line between DMTs 1 and 2 represents the peripheral link between these two DMTs.

**Table S1. MS/MS analyses of the axonemes of the *fap246*, *fap413* and *fap42* mutants — CA proteins assigned to C1a, C1c, C1d, C1e and C2b, or that were not previously confirmed to be components of a specific CA projection.**

| Protein                        | CA projection | Phytozome gene number | MW (kDa) | No. of Unique Peptides |               |               |              | Quantification Ratio |                  |                   |
|--------------------------------|---------------|-----------------------|----------|------------------------|---------------|---------------|--------------|----------------------|------------------|-------------------|
|                                |               |                       |          | WT                     | <i>fap246</i> | <i>fap413</i> | <i>fap42</i> | <i>fap246</i> /WT    | <i>fap42</i> /WT | <i>fap413</i> /WT |
| <b>CA proteins<sup>a</sup></b> |               |                       |          |                        |               |               |              |                      |                  |                   |
| FAP54                          | C1d           | Cre12.g518550         | 319      | 121                    | 127           | 121           | 125          | 1.05                 | 1.13             | 0.99              |
| FAP46                          | C1d           | Cre10.g420800         | 291      | 123                    | 124           | 123           | 126          | 1.00                 | 1.10             | 1.00              |
| FAP221                         | C1d           | Cre11.g476376         | 71       | 25                     | 24            | 22            | 24           | 0.95                 | 1.04             | 0.67              |
| FAP297                         | C1d           | Cre01.g029350         | 74       | 41                     | 41            | 41            | 43           | 0.92                 | 0.96             | 0.94              |
| FAP74                          | C1d           | Cre06.g271150         | 200      | 64                     | 66            | 66            | 67           | 1.07                 | 1.17             | 1.05              |
| PF6                            | C1a           | Cre10.g434400         | 237      | 100                    | 104           | 107           | 107          | 1.11                 | 1.05             | 1.05              |
| PF16                           | C1a           | Cre09.g394251         | 50       | 26                     | 25            | 29            | 24           | 0.97                 | 0.91             | 1.08              |
| FAP92                          | C1a           | Cre13.g562250         | 150      | 60                     | 59            | 60            | 66           | 1.16                 | 1.06             | 0.99              |
| FAP101                         | C1a           | Cre02.g112100         | 86       | 27                     | 27            | 26            | 27           | 1.01                 | 1.04             | 0.81              |
| FAP119                         | C1a           | Cre06.g256450         | 34       | 12                     | 12            | 13            | 12           | 1.13                 | 0.81             | 0.85              |
| FAP227                         | C1a           | Cre17.g729850         | 17       | 17                     | 17            | 17            | 16           | 1.01                 | 0.96             | 0.91              |
| FAP114                         | C1a           | Cre09.g389282         | 32       | 15                     | 14            | 17            | 13           | 0.91                 | 0.79             | 0.59              |
| FAP81                          | C1e           | Cre06.g296850         | 172      | 68                     | 68            | 73            | 68           | 1.07                 | 1.06             | 1.36              |
| FAP216                         | C1c           | Cre12.g497200         | 79       | 33                     | 31            | 32            | 31           | 0.74                 | 0.89             | 0.87              |
| FAP76                          | C1c           | Cre09.g387689         | 162      | 76                     | 82            | 79            | 76           | 1.11                 | 1.02             | 0.87              |
| Hydin                          | C2b           | Cre01.g025400         | 528      | 209                    | 217           | 227           | 212          | 1.06                 | 1.16             | 1.14              |
| FAP7 <sup>a</sup>              | ?             | Cre12.g531800         | 55       | 23                     | 24            | 27            | 26           | 1.01                 | 1.24             | 1.33              |
| FAP47 <sup>a</sup>             | ?             | Cre17.g704300         | 310      | 120                    | 126           | 136           | 123          | 1.07                 | 1.09             | 1.34              |
| FAP49 <sup>b</sup>             | C2            | Cre08.g362050         | 295      | 35                     | 32            | 36            | 40           | 0.98                 | 1.29             | 1.22              |
| FAP65 <sup>a</sup>             | C2            | Cre07.g354551         | 220      | 69                     | 75            | 82            | 69           | 1.15                 | 1.05             | 1.54              |
| FAP70 <sup>a</sup>             | C2            | Cre07.g345400         | 114      | 41                     | 43            | 46            | 42           | 1.17                 | 1.10             | 1.36              |
| FAP72 <sup>b</sup>             | ?             | Cre08.g362000         | 595      | 32                     | 35            | 33            | 40           | 1.36                 | 1.28             | 1.03              |
| FAP75 <sup>a</sup>             | C2            | Cre06.g249900         | 125      | 40                     | 40            | 38            | 38           | 0.91                 | 0.88             | 1.22              |
| FAP99 <sup>a</sup>             | C1            | Cre14.g624400         | 90       | 50                     | 53            | 58            | 53           | 1.22                 | 1.21             | 0.94              |
| FAP105 <sup>a</sup>            | C1            | Cre12.g511750         | 31       | 23                     | 20            | 24            | 18           | 0.74                 | 0.67             | 0.78              |
| FAP108 <sup>a</sup>            | C1            | Cre06.g297200         | 22       | 11                     | 13            | 12            | 11           | 0.93                 | 0.94             | 0.68              |
| FAP123 <sup>a</sup>            | ?             | Cre03.g171800         | 34       | 18                     | 19            | 20            | 19           | 0.94                 | 0.79             | 1.32              |
| FAP125 <sup>a</sup>            | ?             | Cre12.g546100         | 112      | 62                     | 63            | 64            | 68           | 1.13                 | 1.29             | 0.82              |
| FAP139 <sup>b</sup>            | ?             | Cre09.g387912         | 76       | 30                     | 31            | 34            | 32           | 1.04                 | 1.13             | 1.05              |
| FAP147 <sup>a</sup>            | C2            | Cre04.g224250         | 97       | 41                     | 48            | 40            | 42           | 1.43                 | 1.16             | 1.83              |
| FAP154 <sup>b</sup>            | ?             | Cre08.g362100         | 467      | 42                     | 52            | 41            | 58           | 1.25                 | 1.36             | 0.63              |
| FAP171 <sup>a</sup>            | C2            | Cre14.g624900         | 81       | 23                     | 22            | 26            | 26           | 0.83                 | 0.87             | 0.51              |

|                           |       |               |     |    |    |    |    |      |      |      |
|---------------------------|-------|---------------|-----|----|----|----|----|------|------|------|
| <b>FAP174<sup>b</sup></b> | ?     | Cre02.g105950 | 10  | 6  | 6  | 7  | 5  | 1.09 | 0.71 | 0.81 |
| <b>FAP178<sup>b</sup></b> | C2    | Cre10.g418150 | 20  | 6  | 6  | 7  | 5  | 0.87 | 0.51 | 0.60 |
| <b>FAP194<sup>a</sup></b> | ?     | Cre12.g522150 | 52  | 26 | 26 | 27 | 28 | 0.95 | 0.98 | 1.03 |
| <b>FAP225<sup>a</sup></b> | ?     | Cre01.g051050 | 81  | 42 | 45 | 48 | 41 | 1.14 | 0.88 | 1.18 |
| <b>FAP239<sup>a</sup></b> | C2    | Cre03.g145387 | 23  | 13 | 15 | 16 | 14 | 1.20 | 1.12 | 1.29 |
| <b>FAP266<sup>a</sup></b> | ?     | Cre16.g690450 | 22  | 5  | 7  | 8  | 5  | 1.02 | 0.99 | 0.94 |
| <b>FAP275<sup>b</sup></b> | C1    | Cre05.g239200 | 18  | 10 | 8  | 10 | 8  | 0.72 | 0.68 | 0.97 |
| <b>FAP286<sup>b</sup></b> | C2    | Cre12.g509800 | 17  | 11 | 13 | 19 | 9  | 1.11 | 0.64 | 1.26 |
| <b>FAP289<sup>a</sup></b> | C1    | Cre01.g009800 | 46  | 19 | 18 | 22 | 20 | 1.06 | 1.17 | 1.09 |
| <b>FAP312<sup>a</sup></b> | C2    | Cre14.g630200 | 34  | 41 | 40 | 40 | 39 | 0.92 | 0.83 | 1.06 |
| <b>FAP345<sup>b</sup></b> | C1    | Cre15.g640000 | 13  | 29 | 33 | 36 | 31 | 1.39 | 1.19 | 1.30 |
| <b>FAP348<sup>b</sup></b> | C1    | Cre16.g693204 | 96  | 35 | 32 | 36 | 35 | 0.70 | 1.05 | 1.58 |
| <b>FAP380<sup>b</sup></b> | ?     | Cre01.g010400 | 20  | 7  | 7  | 7  | 4  | 0.53 | 0.40 | 0.73 |
| <b>FAP411<sup>b</sup></b> | C1    | Cre09.g409600 | 13  | 13 | 11 | 12 | 14 | 0.82 | 1.21 | 1.08 |
| <b>FAP412<sup>a</sup></b> | C1    | Cre12.g497450 | 57  | 24 | 22 | 24 | 20 | 0.85 | 0.63 | 0.96 |
| <b>FAP416<sup>b</sup></b> | ?     | Cre17.g697750 | 17  | 2  | 2  | 2  | 2  | 1.22 | 1.27 | 1.25 |
| <b>DIP13<sup>b</sup></b>  | ?     | Cre17.g724550 | 13  | 10 | 8  | 13 | 8  | 0.81 | 0.77 | 1.58 |
| <b>DPY30<sup>b</sup></b>  | C1    | Cre06.g279100 | 11  | 5  | 5  | 5  | 4  | 0.83 | 0.66 | 0.73 |
| <b>MOT17<sup>a</sup></b>  | C1    | Cre11.g482300 | 47  | 23 | 23 | 27 | 21 | 0.25 | 0.27 | 0.58 |
| <b>FAP173<sup>c</sup></b> | ?     | Cre16.g690879 | 33  | 15 | 10 | 11 | 14 | 0.25 | 0.27 | 0.58 |
| <b>FAP209<sup>c</sup></b> | C1c   | Cre02.g147750 | 111 | 43 | 44 | 43 | 47 | 1.77 | 1.23 | 3.87 |
| <b>FAP219<sup>c</sup></b> | C1c   | Cre16.g650450 | 25  | 18 | 17 | 17 | 18 | 0.81 | 0.88 | 1.03 |
| <b>FAP244<sup>c</sup></b> | C2    | Cre08.g374700 | 178 | 55 | 56 | 58 | 55 | 1.06 | 1.01 | 1.29 |
| <b>FAP279<sup>c</sup></b> | C1d   | Cre06.g268650 | 30  | 14 | 16 | 18 | 16 | 1.12 | 1.14 | 0.98 |
| <b>FAP331<sup>c</sup></b> | C1b/f | Cre06.g308000 | 205 | 89 | 89 | 88 | 91 | 1.04 | 0.96 | 1.48 |
| <b>FAP401<sup>c</sup></b> | C1a/e | Cre12.g529700 | 101 | 39 | 38 | 38 | 40 | 0.88 | 0.89 | 1.75 |

<sup>a</sup>Novel proteins that are predicted to be CA proteins by both (Zhao et al., 2019) and (Dai et al., 2020).

<sup>b</sup>Novel proteins that are predicted to be CA proteins only by (Zhao et al., 2019).

<sup>c</sup>Novel proteins that are predicted to be CA proteins only by (Dai et al., 2020).



**Table S2. Exclusive unique FAP246 and FAP413 peptides identified in the proteomic analyses of *fap246* axonemes**

| <b>Protein</b> | <b>Peptide Sequence</b>              | <b>Start residue number</b> | <b>End residue number</b> |
|----------------|--------------------------------------|-----------------------------|---------------------------|
| <b>FAP246</b>  | TADGLKPAYLTLSTGTDLANADVLGAFPHLQTLVLR | 62                          | 98                        |
|                | SLPPPPPEPVEEPK                       | 30                          | 44                        |
|                | PSDGASVAGSSR                         | 2                           | 13                        |
|                | NALDMLR                              | 151                         | 157                       |
|                | LTSLSAAHNR                           | 165                         | 174                       |
|                | LPADGASGPTNLR                        | 132                         | 144                       |
|                | HLTAVDVSGNK                          | 113                         | 123                       |
|                | DAFQPSMLSAGLSQLGR                    | 45                          | 61                        |
| <b>FAP413</b>  | AGLLDLLR                             | 1126                        | 1133                      |
|                | SLVSGSEDKTLR                         | 1442                        | 1453                      |

**Table S3. Exclusive unique FAP42 and FAP413 peptides identified in the proteomic analyses of *fap42* axonemes**

| Protein      | Peptide Sequence                    | Start residue number | End residue number |
|--------------|-------------------------------------|----------------------|--------------------|
| <b>FAP42</b> | AALQAAWAAGK                         | 1690                 | 1770               |
|              | AQVAGQLVLEAFDWR                     | 1927                 | 1949               |
|              | DALYVVFVSPGQLR                      | 906                  | 919                |
|              | DGSTLVLDPTAQLR                      | 2401                 | 2414               |
|              | DLEGLQAGHR                          | 123                  | 130                |
|              | EAEAAAAEAAMK                        | 925                  | 936                |
|              | EAI STLSP IIR                       | 510                  | 520                |
|              | EFPDVFAYPR                          | 570                  | 579                |
|              | EMEAAAAAGSPFDATIVNDDPEAAAY AELTR    | 732                  | 761                |
|              | GAGTTAITNAALLR                      | 863                  | 872                |
|              | GVNEEGTYCLTVTCTSPLAGAAAGAGALTEVPCHR | 2101                 | 2135               |
|              | HAVAAVTLVK                          | 286                  | 295                |
|              | LALSDAHVAALR                        | 1418                 | 1429               |
|              | LHATELPASGAGYCLLALYDTGSR            | 2077                 | 2100               |
|              | LIVLVGPSGVGR                        | 306                  | 317                |
|              | LPVVEGPLELALALK                     | 1701                 | 1715               |
|              | LRDHLTETDEEIAAR                     | 711                  | 725                |
|              | MLLQQLGEQLELVPVVT SRPPLR            | 1595                 | 1617               |
|              | NVLVLAGPAGVGK                       | 1577                 | 1589               |
|              | QQLLQLQDDGR                         | 1489                 | 1500               |
|              | REMEAAAAAGSPFDATIVNDDPEAAAY AELTR   | 731                  | 761                |
|              | RIDGLYV FVSPPSLDELER                | 420                  | 438                |
|              | RPEELVLNSPDVPMVTTVAPPPPEPTGGK       | 72                   | 101                |
|              | SCTVLADNALAK                        | 2297                 | 2300               |
|              | TLMANAGLLELPR                       | 1958                 | 1968               |
|              | VALLYVDSPEPVK                       | 1460                 | 1472               |
|              | VLPAGGKPGSGPVLLSAEQLAER             | 2332                 | 2354               |

|               |                    |      |      |
|---------------|--------------------|------|------|
|               | VPELAVVPSTSLK      | 1379 | 1391 |
|               | YGEAPAGAVGVLFRR    | 1935 | 1948 |
| <b>FAP413</b> | VQPAAAAAYEAQDDLRL  | 423  | 438  |
|               | VLDSVASSSEALQELQPR | 94   | 111  |
|               | SVVSGSLDSTLR       | 1791 | 1802 |
|               | SLVEGVGDTLAR       | 328  | 339  |
|               | LPLSQAFEWLLEAPLNR  | 923  | 939  |
|               | INVVSSVCFSPDGR     | 1643 | 1456 |
|               | FGAGSWLR           | 373  | 380  |
|               | DLEGPLAGLTAHLR     | 351  | 364  |
|               | ASAEATKPNQQQR      | 14   | 26   |
|               | APTGTAVFQEAR       | 1377 | 1388 |

**Table S4. Primers used in this study to confirm the mutant insertion site**

| Name          | Sequence (5'-3')     | Sequence (3'-5')     |
|---------------|----------------------|----------------------|
| <i>fap246</i> | TGTTGTGCCGCGCCTGCGAG | TCTTGGCTCAGCGGCTCTTG |
| <i>fap413</i> | ACATTGCCCTCAACAAGACC | TGATAGGACTCGGGATGGAG |
| <i>fap42</i>  | GCCTACCTGTTCATTGGCAT | GCCTACCTGTTCATTGGCAT |

**Table S5. Summary of image processing information for the strains used in this study**

| Strains       | Number of Tomograms | Number of averaged CA repeats | Resolution (nm) | TEM/Camera   |
|---------------|---------------------|-------------------------------|-----------------|--------------|
| WT            | 14                  | 664                           | 2.3             | Krios/K2/VPP |
| <i>fap246</i> | 38                  | 1633                          | 2.2             | Krios/K3/VPP |
| <i>fap413</i> | 30                  | 1401                          | 2.5             | Krios/K3/VPP |
| <i>fap42</i>  | 25                  | 1142                          | 2.5             | Krios/K3/VPP |

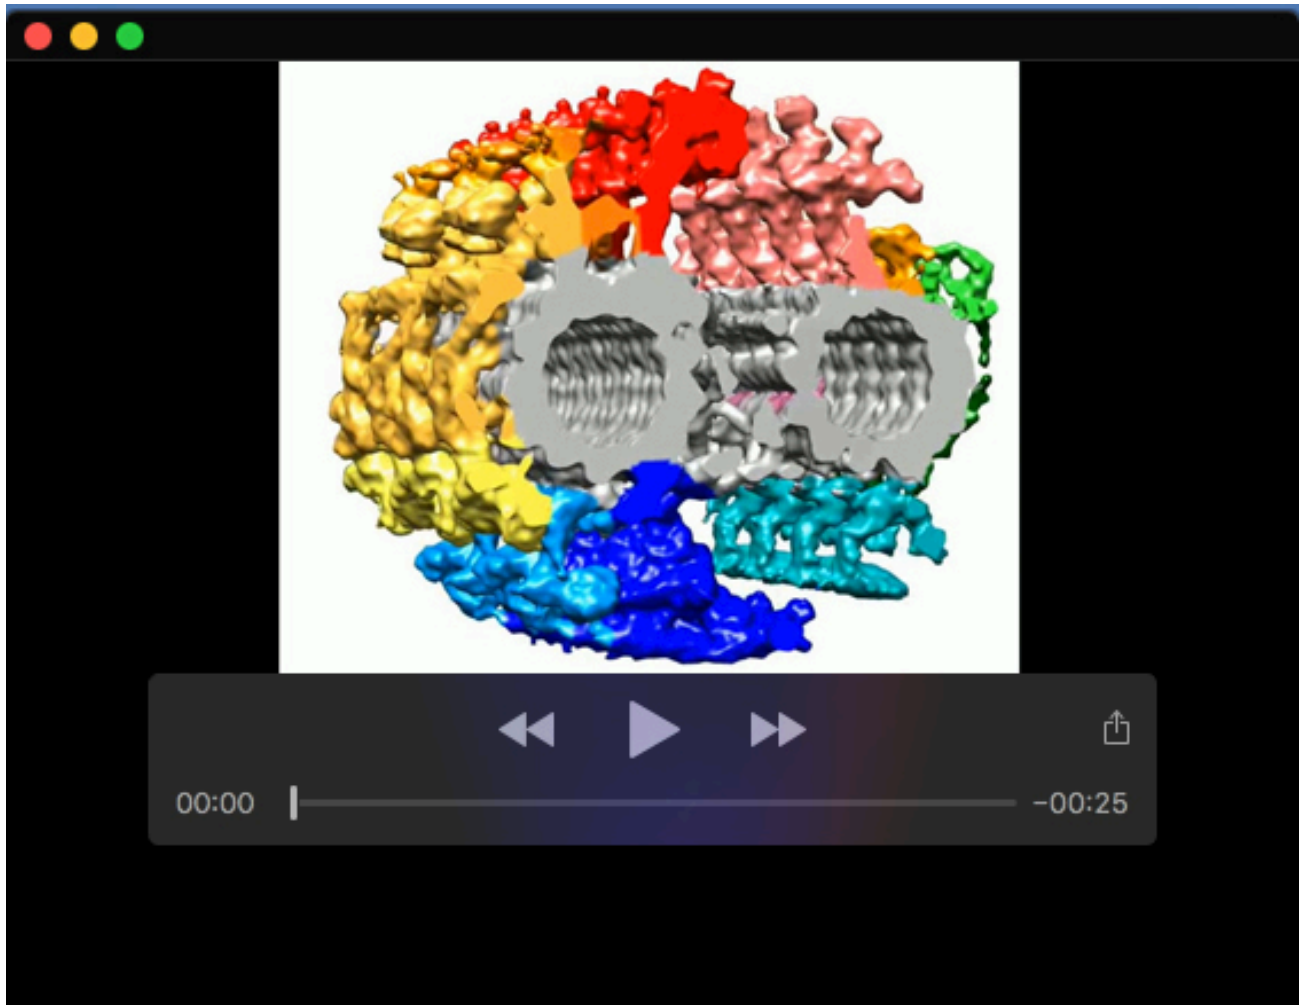

**Movie 1. Animated 3D visualization of the averaged repeats of the *Chlamydomonas* WT CA.** The averaged CA repeats are shown in cross-sectional orientation at the beginning of the animation. The CA projections associated with the C1 and C2 microtubules are indicated (nomenclature and color coding follow that of (Carbajal-Gonzalez et al., 2013) and (Fu et al., 2019)).

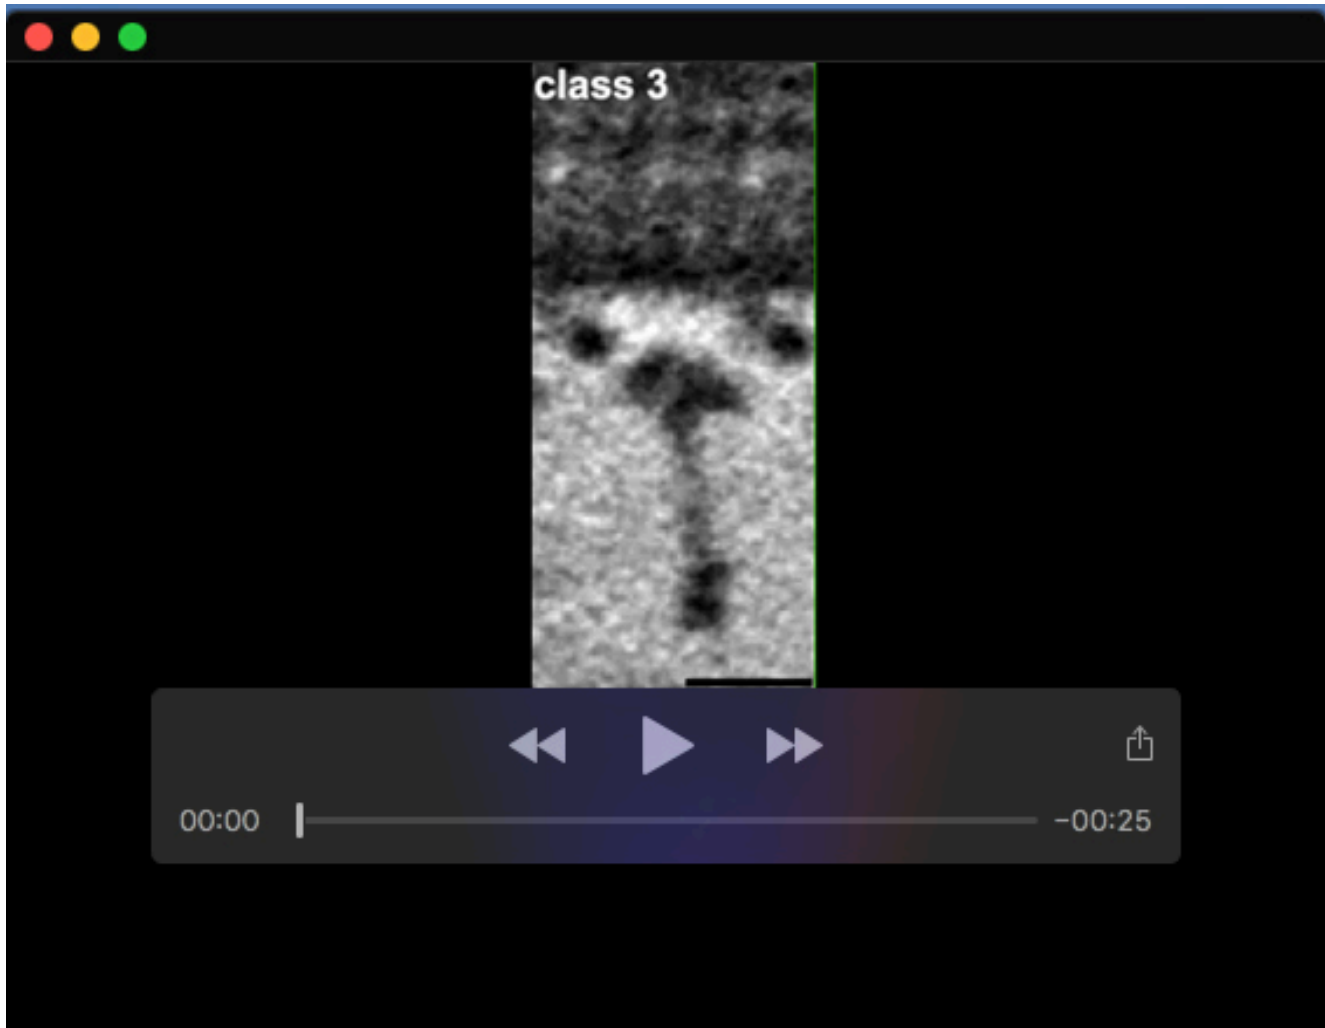

**Movie 2. Comparison of the four class averages of the *fap246* CA shows positional flexibility of the C1b projection.** Sequence of one tomographic slice for each class average in longitudinal orientation. Related to Fig. 2. Scale bar: 10 nm.



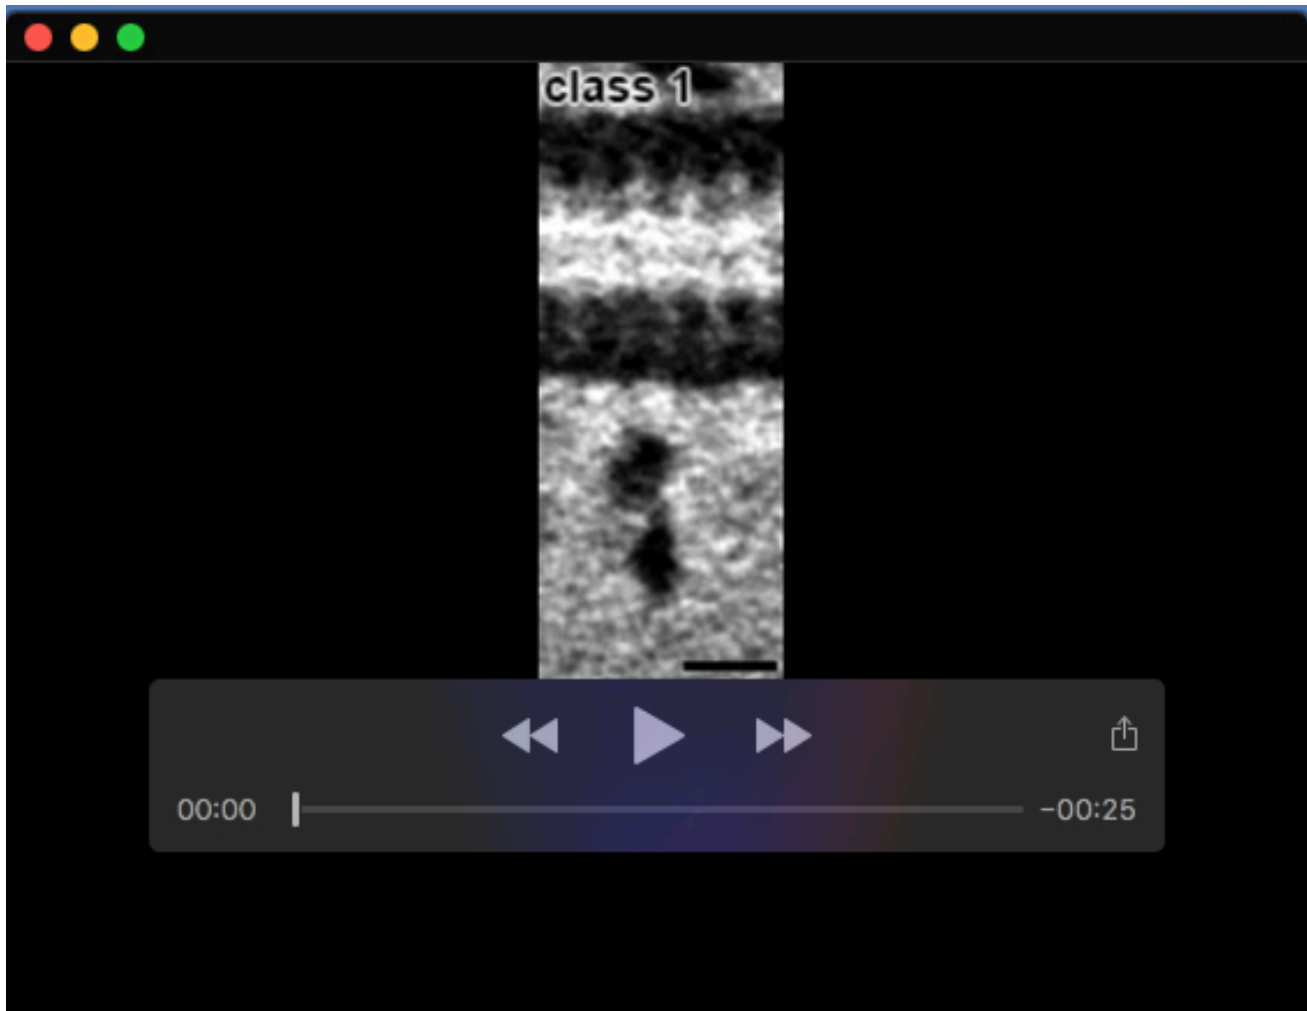

**Movie 3. Comparison of the three class averages of the *fap42* CA shows positional flexibility of the C1f projection.** Sequence of one tomographic slice for each class average in longitudinal orientation. Related to Fig. 4. Scale bar: 10 nm.

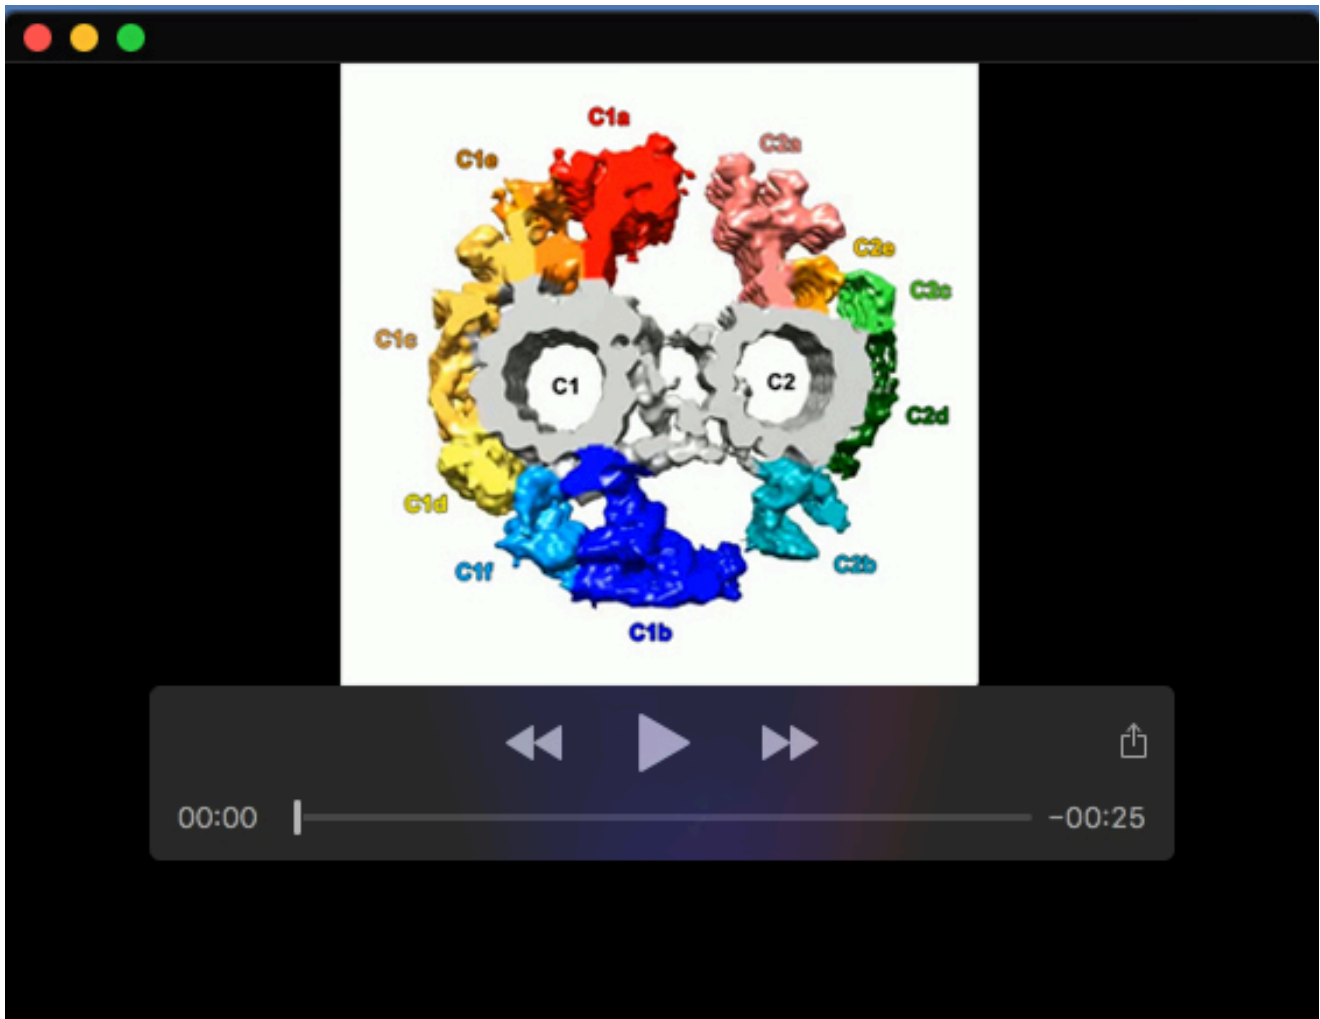

**Movie 4.** Animated 3D visualization of the averaged repeats of the *Chlamydomonas* WT CA highlighting the locations of FAP246, FAP413, and FAP42 within the C1b projection. Nomenclature and color coding of the CA projections are indicated.

### Supplementary References:

- Carbajal-Gonzalez, B. I., Heuser, T., Fu, X., Lin, J., Smith, B. W., Mitchell, D. R. and Nicastro, D.** (2013). Conserved structural motifs in the central pair complex of eukaryotic flagella. *Cytoskeleton (Hoboken)* **70**, 101-120.
- Dai, D., Ichikawa, M., Peri, K., Rebinsky, R. and Bui, K.** (2020). Identification and mapping of central pair proteins by proteomic analysis. *Biophysics and Physicobiology* **17** 71-85.
- Fu, G., Zhao, L., Dymek, E., Hou, Y., Song, K., Phan, N., Shang, Z., Smith, E. F., Witman, G. B. and Nicastro, D.** (2019). Structural organization of the C1a-e-c supercomplex within the ciliary central apparatus. *J Cell Biol* **218**, 4236-4251.
- Hoops, H. J. and Witman, G. B.** (1983). Outer doublet heterogeneity reveals structural polarity related to beat direction in *Chlamydomonas* flagella. *J Cell Biol* **97**, 902-8.
- Lindemann, C. B. and Mitchell, D. R.** (2007). Evidence for axonemal distortion during the flagellar beat of *Chlamydomonas*. *Cell Motil Cytoskeleton* **64**, 580-9.
- Mitchell, D. R.** (2003). Orientation of the central pair complex during flagellar bend formation in *Chlamydomonas*. *Cell Motil Cytoskeleton* **56**, 120-9.
- Zhao, L., Hou, Y., Picariello, T., Craige, B. and Witman, G. B.** (2019). Proteome of the central apparatus of a ciliary axoneme. *J Cell Biol* **218**, 2051-2070.
